# Supplementary material
Source: PubMed Central journal article supplement (PMC3107333)
Supplement: 1104526108_pnas.1104526108_SI.pdf [file 1104526108_pnas.1104526108_SI.pdf]

# Supporting Information

Smith et al. 10.1073/pnas.1104526108

## SI Text

**Solid-State NMR Experimental Details.** Solid-state  $^1\text{H}$ ,  $^{13}\text{C}$ , and  $^{27}\text{Al}$  NMR experiments were conducted on a Bruker AVANCE III spectrometer (18.8 T) operating at frequencies of 800.43 MHz for  $^1\text{H}$ , 201.26 MHz for  $^{13}\text{C}$ , and 208.56 MHz for  $^{27}\text{Al}$  and under conditions of magic angle spinning (MAS) at 298 K. Solid-state  $^1\text{H}$ ,  $^{13}\text{C}$ , and  $^{29}\text{Si}$  NMR experiments were conducted at 298 K on a Bruker AVANCE-II spectrometer (11.7 T) operating at frequencies of 500.24 MHz for  $^1\text{H}$ , 125.78 MHz for  $^{13}\text{C}$ , and 99.38 MHz for  $^{29}\text{Si}$ . Two-dimensional  $^{27}\text{Al}\{^1\text{H}\}$ ,  $^{29}\text{Si}\{^1\text{H}\}$ , and  $^{13}\text{C}\{^1\text{H}\}$  heteronuclear correlation (HETCOR) experiments were conducted at 298 K under MAS conditions with cross-polarization contact times of 0.5, 1.0, and 1.5 ms, respectively, at 11.7 or 18.8 T for tricalcium silicate and tricalcium aluminate, respectively. The  $^1\text{H}$ ,  $^{13}\text{C}$ , and  $^{29}\text{Si}$  chemical shifts were referenced to tetramethylsilane using tetrakis(trimethylsilyl)silane  $[(\text{CH}_3)_3\text{Si}]_4\text{Si}$  as a secondary standard, and the  $^{27}\text{Al}$  chemical shifts were referenced to an aqueous solution of 0.5 M aluminum nitrate  $[\text{Al}(\text{NO}_3)_3]$ .

Solid-state 1D single-pulse  $^1\text{H}$ ,  $^{13}\text{C}$ , and  $^{29}\text{Si}$  MAS measurements were performed at 11.7 T, 298 K, and under 10-kHz MAS conditions using a Bruker 4-mm H-X double-resonance probehead and zirconia rotors with Kel-F® caps. One-dimensional single-pulse  $^{13}\text{C}$  experiments were conducted using a  $90^\circ$  pulse length of 4.0  $\mu\text{s}$  (3.0 dB), under conditions of proton decoupling (3.4  $\mu\text{s}$   $90^\circ$   $^1\text{H}$  pulses, 4.0 dB), and using a recycle delay of 60 s. One-dimensional single-pulse  $^{29}\text{Si}$  experiments were conducted using a  $90^\circ$  pulse length of 3.7  $\mu\text{s}$  (3.0 dB), under conditions of proton decoupling (3.4  $\mu\text{s}$   $90^\circ$   $^1\text{H}$  pulses, 4.0 dB), and using a recycle delay of 100 s. One-dimensional single-pulse  $^1\text{H}$  experiments were performed using a  $90^\circ$  pulse length of 3.4  $\mu\text{s}$  (4.0 dB) and a recycle delay of 2 s.

Solid-state 1D single-pulse  $^1\text{H}$ ,  $^{13}\text{C}$ , and  $^{27}\text{Al}$  measurements were performed at 18.8 T, 298 K, and under 20-kHz MAS conditions using a Bruker 3.2-mm H-X-Y triple-resonance probehead with zirconia rotors and Kel-F® caps. One-dimensional single-pulse  $^{13}\text{C}$  experiments were conducted using a  $90^\circ$  pulse length of 4.0  $\mu\text{s}$  (−0.19 dB), under conditions of proton decoupling (3.4  $\mu\text{s}$   $90^\circ$   $^1\text{H}$  pulses, −0.19 dB), and using a recycle delay of 60 s. One-dimensional single-pulse  $^{27}\text{Al}$  experiments were conducted using a high-power 1.0- $\mu\text{s}$  pulse length (−0.19 dB) for  $^{27}\text{Al}$ , corresponding to a  $30^\circ$  tip angle, and a recycle delay of 10 s. The high magnetic field mitigates the effects of second-order quadrupolar interactions and improves signal sensitivity and resolution of the  $^{27}\text{Al}$  signals. The single-pulse  $^{27}\text{Al}$  NMR measurements were calibrated using a dense 4.7-mg piece of AlN as an external reference for spin counting and establish that >95% of the  $^{27}\text{Al}$  species are NMR visible. One-dimensional single-pulse  $^1\text{H}$  experiments were performed using a  $90^\circ$  pulse length of 3.4  $\mu\text{s}$  (−0.19 dB) and a recycle delay of 2 s.

All solid-state HETCOR NMR spectra were acquired using frequency-switched Lee–Goldberg (FSLG) homonuclear decoupling during the  $^1\text{H}$  evolution period and a radio-frequency field of 70 kHz to enhance resolution in the  $^1\text{H}$  dimension. All 2D  $^{13}\text{C}\{^1\text{H}\}$  HETCOR spectra were acquired with a 1.5-ms contact time and FSLG homonuclear decoupling. The 2D  $^{27}\text{Al}\{^1\text{H}\}$  HETCOR spectra were acquired with a 500- $\mu\text{s}$  contact time and a  $^1\text{H}$  spin-diffusion time of 10  $\mu\text{s}$  to probe immediate molecular proximities. The 2D  $^{29}\text{Si}\{^1\text{H}\}$  HETCOR spectra were acquired with a 1-ms  $^1\text{H}$  contact pulse to enable efficient  $^1\text{H}$ – $^{29}\text{Si}$  cross-polarization. The 2D  $^{13}\text{C}\{^1\text{H}\}$ ,  $^{27}\text{Al}\{^1\text{H}\}$ ,  $^{29}\text{Si}\{^1\text{H}\}$  experiments were acquired with 64  $t_1$  increments of 24  $\mu\text{s}$ , 3024 transients, and using a recycle delay of 1 s that resulted in an experimental time of 27 h for each 2D experiment.

NMR lineshape analyses were conducted using the software “dmfit #20090330,” with lineshapes fit according to signal amplitude, position, and width (1). One-dimensional single-pulse  $^{27}\text{Al}$  and  $^{29}\text{Si}$  MAS spectra were deconvoluted by collectively fitting peak positions with Gaussian lineshapes that were subsequently kept the same across spectra obtained for similar samples, but with different saccharide species present.

**Surface Forces Apparatus Experimental Details.** Surface forces measurements were performed using a surface forces apparatus (SFA) 2000 to determine the normal force-distance profiles during approach of the mica surfaces (2). A 1–5- $\mu\text{m}$ -thick mica sheet was glued onto a cylindrical silica disk of radius  $R = 1.5$  cm, and then two curved and Ag-backed mica surfaces were mounted in the SFA chamber in a crossed-cylinder geometry. Aqueous solutions were prepared by titrating distilled water with NaOH to pH 12.7 and dissolving glucose or sucrose to form 0.2 wt% solutions. The solutions were comparable to those associated with hydrating aluminate and silicate powders, except for the presence of the  $\text{Na}^+$  cations, instead of  $\text{Ca}^{2+}$ , which avoided precipitation of  $\text{Ca}(\text{OH})_2$  that would have interfered with the SFA measurements. After 1 h, approximately 200  $\mu\text{L}$  of the alkaline aqueous solution, with or without saccharide, was injected between the mica surfaces when separated at a relatively large distance (approximately 1  $\mu\text{m}$ ) and allowed to equilibrate for 30 min before the initial approach ( $v_{\text{approach}} \sim 10$  nm/s). All experiments were performed at  $25^\circ\text{C}$ .

**Scanning Electron Microscopy Experimental Details.** Scanning electron micrographs were conducted using a FEI XL40 Sirion FEG digital electron scanning microscope at a magnification of 5000 $\times$  and an electron beam voltage of 10 kV.

1. Massiot D, et al. (2002) Modelling one- and two-dimensional solid-state NMR spectra. *Magn Reson Chem* 40:70–76.

2. Israelachvili J, et al. (2010) Recent advances in the surface forces apparatus (SFA) technique. *Rep Prog Phys* 73:12850–12853.
